# Supplementary material for: Clinical and molecular characteristics of COVID-19 patients with persistent SARS-CoV-2 infection
Source: PubMed Central journal article supplement (PMC8190301; doi:10.1038/s41467-021-23621-y), 2021-06-09
Supplement: 41467_2021_23621_MOESM1_ESM.pdf [file 41467_2021_23621_MOESM1_ESM.pdf]

# Clinical and molecular characteristics of COVID-19 patients with persistent SARS-CoV-2 infection

## Authors and Affiliations

Bin Yang<sup>1,2</sup>, Junpeng Fan<sup>1,2</sup>, Jia Huang<sup>1,2</sup>, Ensong Guo<sup>1,2</sup>, Yu Fu<sup>1,2</sup>, Si Liu<sup>1,2</sup>, Rourou Xiao<sup>1,2</sup>, Chen Liu<sup>1,2</sup>, Funian Lu<sup>1,2</sup>, Tianyu Qin<sup>1,2</sup>, Chao He<sup>1,2</sup>, Zizhuo Wang<sup>1,2</sup>, Xu Qin<sup>1,2</sup>, Dianxing Hu<sup>1,2</sup>, Lixin You<sup>1,2</sup>, Xi Li<sup>1,2</sup>, Tian Wang<sup>1,2</sup>, Peng Wu<sup>1,2</sup>, Gang Chen<sup>1,2</sup>, Jianfeng Zhou<sup>3</sup>, Kezhen Li<sup>1,2\*</sup>, Chaoyang Sun<sup>1,2\*</sup>

1. Department of Obstetrics and Gynecology, Tongji Hospital, Tongji Medical College, Huazhong University of Science and Technology, Wuhan 430030, China.

2. Cancer Biology Research Center, Tongji Hospital, Tongji Medical College, Huazhong University of Science and Technology, Wuhan 430030, China

3. Department of Hematology, Tongji Hospital, Tongji Medical College, Huazhong University of Science and Technology, Wuhan 430030, China

These authors contribute equally: Bin Yang, Junpeng Fan, and Jia Huang

These authors jointly supervised this work: Kezhen Li, Chaoyang Sun. Correspondence should be addressed to K.L. (email: [tjkeke@126.com](mailto:tjkeke@126.com)) or to C.S. (email: [suncydoctor@gmail.com](mailto:suncydoctor@gmail.com)).

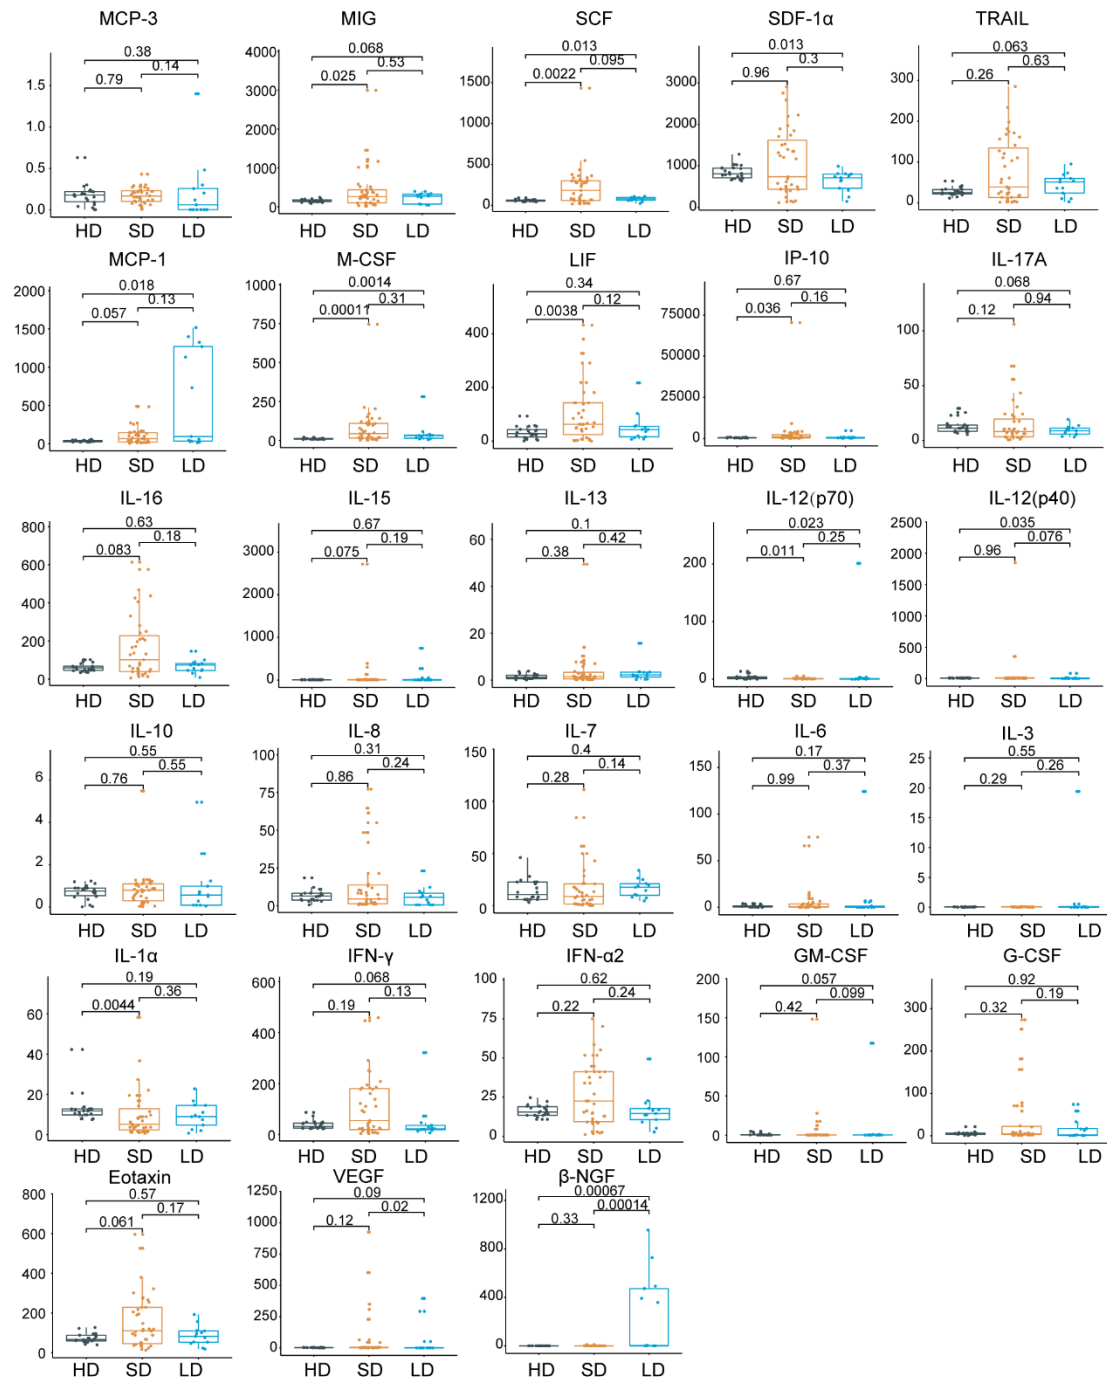

**Supplementary Fig. 1 Clinical and cytokines/chemokines characteristics in LDs and SDs.**

Samples from HDs (n=22) LDs (n=12) and SDs (n=38) were collected, and assays were performed to measure the concentrations of 48 cytokines/chemokines. The box plots show the median (middle line) and the first and third quartiles (boxes), whereas the whiskers show 1.5× the IQR above and below the box. One-side Wilcoxon rank-sum test are performed.

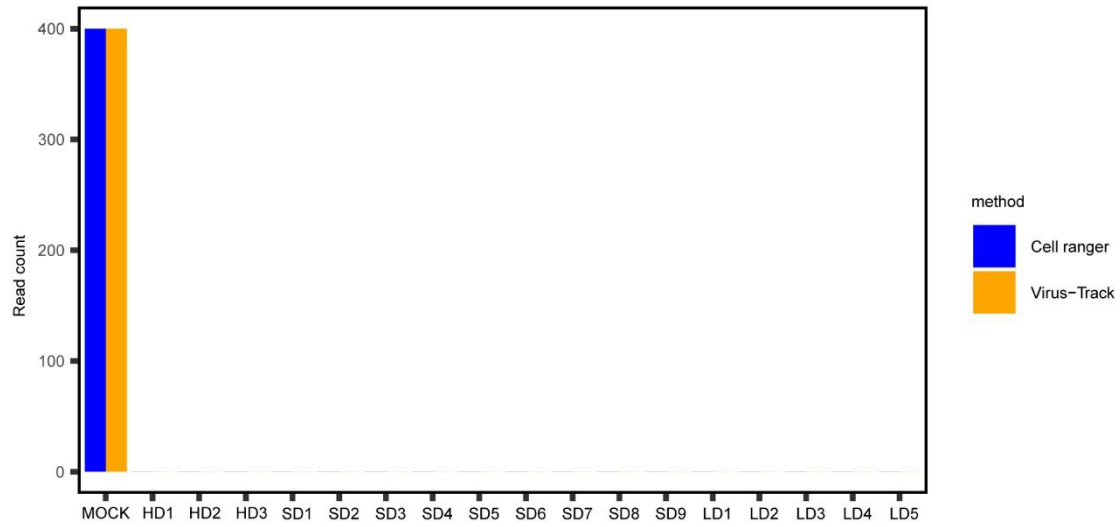

**Supplementary Fig. 2 SARS-CoV-2 transcripts detected in samples using Virus-Track and Cell ranger.**

Mock sample with SARS-CoV-2 transcripts was generated by add 200 SARS-CoV-2 paired reads to the health control. SARS-CoV-2 transcripts were identified from sequencing data using Viral-Track (yellow) and Cell Ranger (blue) with a modified reference contain SARS-CoV-2 genome (NC\_045512.2).

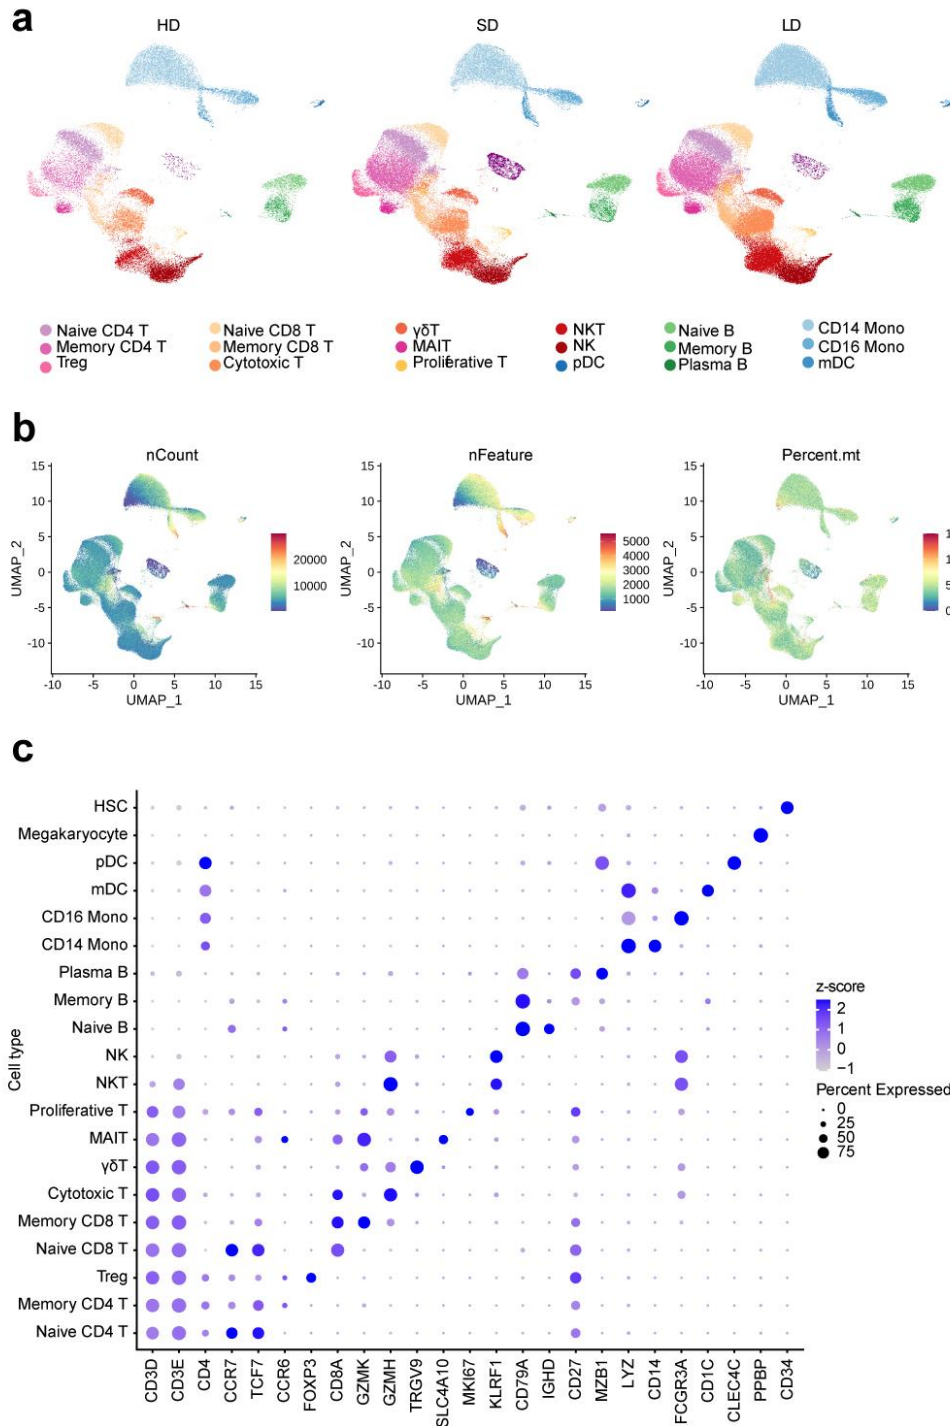

**Supplementary Fig.3 Quality of clustering and canonical markers expression in PBMCs for healthy donors and COVID-19 patients** **a**, UMAP plot of the HDs, SDs, LDs conditions. Each dot corresponds to a single cell, colored by cell type. **b**, UMAP plot of UMIs gene counts and percentage of mitochondrial genes in all cells. **c**, Dot plot of canonical cell markers. The color intensity indicates the expression level of each marker and the point size indicates the ratio of cells that has marker expressed.

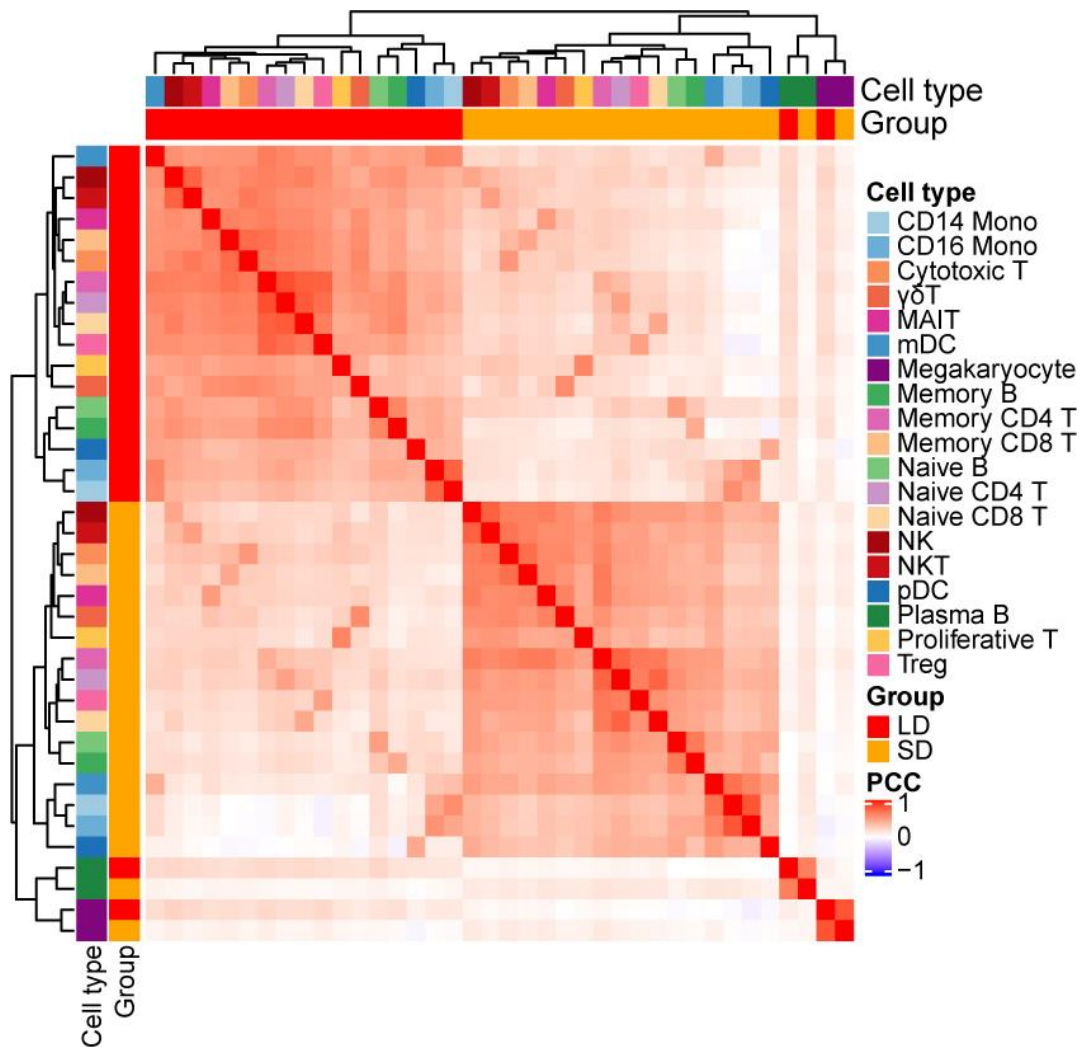

**Supplementary Fig.4 Differences in cell compositions by Single-cell transcriptomes of PBMCs.**

Hierarchical clustering using the PCC of a normalized transcriptome between disease groups at cell type resolution. The color intensity indicates the PCC and the color bars above the heatmap indicate the cell type and disease group.

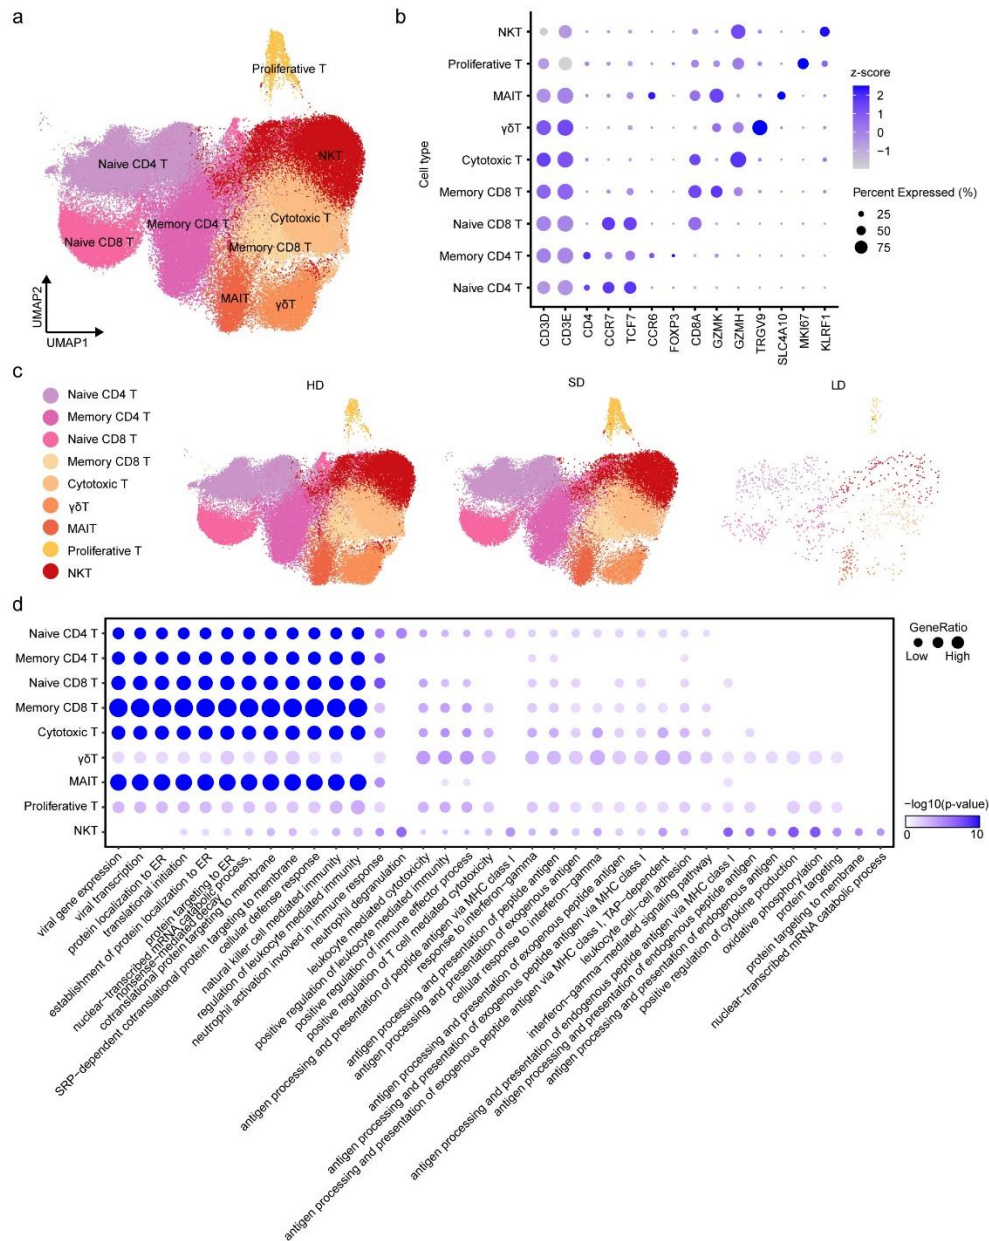

**Supplementary Fig.5 Transcriptional signatures associated with long viral shedding duration of published data.** **a**, UMAP plot of single cells colored by cell types identified from HDs (n=20), SDs (n=16), LDs (n=2). **b**, Dot plot of canonical cell markers. The color intensity indicates the expression level of each marker and the point size indicates the ratio of cells that has marker expressed. **c**, UMAP plot of the HDs, SDs, LDs conditions. Each dot corresponds to a single cell, colored by cell type. **d**, Enriched GO pathways of down-regulated genes between LDs and HDs at cell type resolution. Pathways enriched by ribosomal genes are labeled in red. The color intensity indicates the enrichment *p*-values and the point size indicates the ratio of gene enrich in each pathway. **e**, Expression level of selected genes across 7 samples. The color intensity indicates the relative expression level.

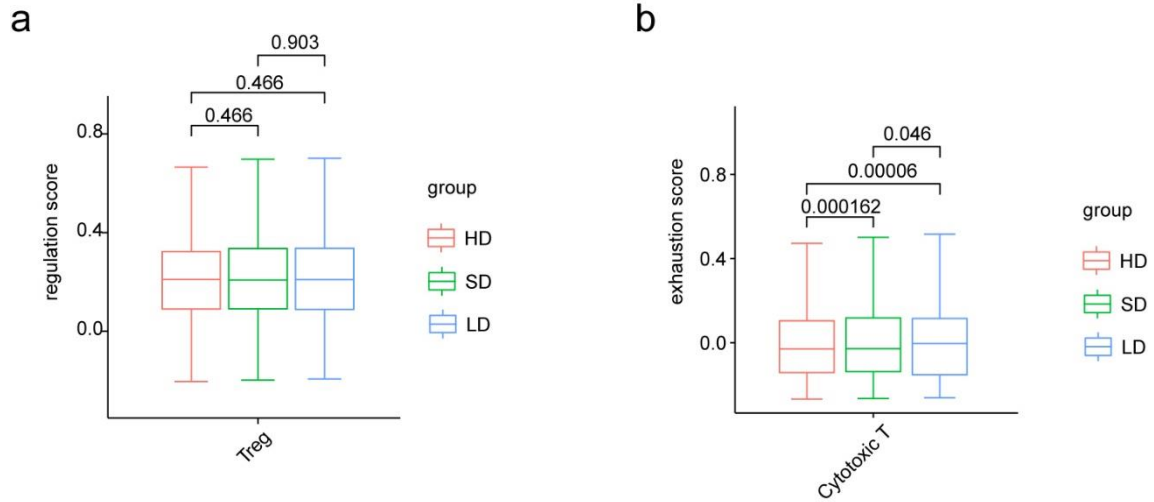

**Supplementary Fig.6 Compare regulation and exhaustion score in each group. a.** Box plot of regulation scores for each group (HDs (n=3), SDs (n=9), LDs (n=5)) in Treg. **b.** Box plot of exhaustion scores for each group (HDs (n=3), SDs (n=9), LDs (n=5)) in cytotoxic T cells. The box plots show the median (middle line) and the first and third quartiles (boxes), whereas the whiskers show 1.5× the IQR above and below the box. One-side Wilcoxon rank-sum test are performed.

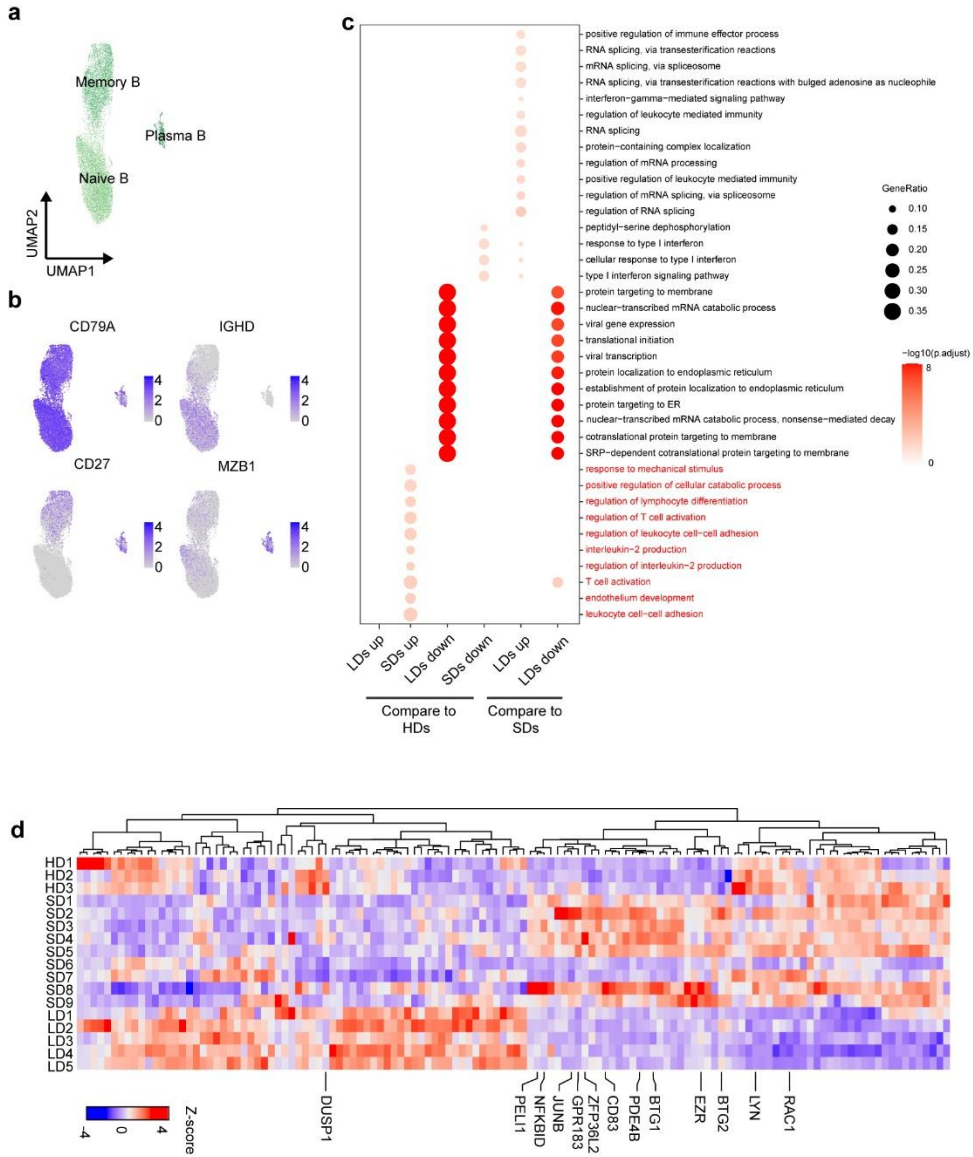

**Supplementary Fig.7 Immunological features of B cell subsets.** **a**, UMAP projection of B cells. Each dot corresponds to a single cell, colored by cell type. **b**, UMAP plot of canonical markers in 3 cell clusters. Data are colored according to log scaled expression levels. **c**, Enriched GO pathways of COVID-19 groups in memory B cells (top 2 columns: DEGs between LDs and SDs, bottom 4 columns: DEGs for SDs and LDs compared to HDs). Pathway enriched by SDs up-regulated genes are labeled in red. The color intensity indicates the enrichment  $p$ -values and the point size indicates the ratio of gene enrich in each pathway. **d**, Hierarchical clustering of expression of DEGs in memory B cells at sample level. The color intensity indicates the relative expression of each gene.



**Supplementary Table 1 Demographic characteristics and laboratory findings of enrolled patients with cytokine measurements.**

|                                              |                                          | Normal range | SDs (n=38)      | LDs (n=12)     | <i>p</i> value <sup>#</sup> |
|----------------------------------------------|------------------------------------------|--------------|-----------------|----------------|-----------------------------|
| Age (years, median, (IQR))                   |                                          |              | 57(38.25-67.75) | 59.5(54-63.25) | 0.33                        |
| Sex*                                         |                                          |              |                 |                | 0.73                        |
|                                              | Female                                   |              | 20              | 7              |                             |
|                                              | Male                                     |              | 18              | 5              |                             |
| Comorbidities*                               |                                          |              |                 |                |                             |
|                                              | Hypertension,%                           |              | 10(26.3)        | 6(50)          | 0.12                        |
|                                              | Cardiovascular disease,%                 |              | 5(13.2)         | 1(8.3)         | 0.95                        |
|                                              | Diabetes,%                               |              | 7(18.4)         | 5(41.7)        | 0.1                         |
| Duranton of viral shedding (days,median,IQR) |                                          |              | 16(11.25-19)    | 57(53-76.5)    | 0                           |
| Blood routine                                |                                          |              |                 |                |                             |
|                                              | Whiteblood count, x 10 <sup>9</sup> /L   | 3.5-9.5      | 6.17±2.52       | 5.86±2.58      | 0.71                        |
|                                              | Neutrophil count, x 10 <sup>9</sup> /L   | 1.8-6.3      | 4.36±2.51       | 4.17±2.48      | 0.81                        |
|                                              | Lymphocyte count, x 10 <sup>9</sup> /L   | 1.1-3.2      | 1.22±0.55       | 1.19±0.50      | 0.85                        |
|                                              | Platelet count, x 10 <sup>9</sup> /L     | 125-350      | 210.65±84.5     | 188.8±87.9     | 0.45                        |
|                                              | Hemoglobin, g/L                          | 115-150      | 128.9±28.1      | 120.7±19.3     | 0.35                        |
| Coagulation function                         |                                          |              |                 |                |                             |
|                                              | Prothrombin time,s                       | 11.5-14.5    | 13.78±0.78      | 13.63±0.71     | 0.062                       |
|                                              | Activated partial thromboplastin time, s | 29-42        | 42.23±5.18      | 38.61±4.36     | 0.055                       |
|                                              | D-dimer, mg/L                            | < 0.5        | 1.12±1.86       | 1.63±3.17      | 0.527                       |
| Blood biochemistry                           |                                          |              |                 |                |                             |
|                                              | Alanine aminotransferase, U/L            | ≤33          | 31.39±32.6      | 33±28          | 0.88                        |
|                                              | Aspartate aminotransferase, U/L          | ≤32          | 26±16.64        | 22.42±6.69     | 0.48                        |
|                                              | Lactate dehydrogenase, U/L               | 135-214      | 236.8±54.23     | 242.08±145.25  | 0.86                        |
| Infection-related biomarkers                 |                                          |              |                 |                |                             |
|                                              | Procalcitonin,ng/ml                      | < 0.05       | 0.55±1.73       | 1.05±2.41      | 0.51                        |
|                                              | CRP,mg/L                                 | ≤10          | 35.02±48.32     | 55.02±64.88    | 0.26                        |
|                                              | Erythrocyte sedimentation rate,mm/H      | 0-20         | 32.27±28        | 45.4±33.89     | 0.22                        |

IQR: the interquartile range; CRP: C-reactive protein. \**p* values obtained by Fisher's exact test and the rest of <sup>#</sup>*p* values obtained by two-tailed unpaired student-t test.

**Supplemental Table 2 Demographic characteristics of people who have been performed single-cell sequencing**

|                                    | Normal Range | Long-term infection                           |         |         |        |          | Short-term infection                                                 |         |          |         |          |                                     |        |          |        | Healthy donor |       |       |
|------------------------------------|--------------|-----------------------------------------------|---------|---------|--------|----------|----------------------------------------------------------------------|---------|----------|---------|----------|-------------------------------------|--------|----------|--------|---------------|-------|-------|
|                                    |              | LD1                                           | LD2     | LD3     | LD4    | LD5      | SD1                                                                  | SD2     | SD3      | SD4     | SD5      | SD6                                 | SD7    | SD8      | SD9    | HD1           | HD2   | HD3   |
| <b>Sequenced cell number</b>       |              | 11886                                         | 11029   | 10352   | 13534  | 9196     | 8419                                                                 | 8462    | 11153    | 8407    | 7952     | 10453                               | 8905   | 9523     | 8137   | 9628          | 10345 | 10565 |
| <b>Characteristics</b>             |              |                                               |         |         |        |          |                                                                      |         |          |         |          |                                     |        |          |        |               |       |       |
| Age(years)                         |              | 64                                            | 54      | 58      | 36     | 55       | 57                                                                   | 59      | 74       | 59      | 56       | 41                                  | 26     | 65       | 60     | 36            | 43    | 29    |
| Gender                             |              | M                                             | F       | F       | F      | F        | F                                                                    | F       | F        | M       | F        | F                                   | F      | F        | F      | F             | F     | F     |
| Symptoms onset                     |              | Fever, fatigue, Sore throat, cough, of breath |         |         |        |          | Fever, fatigue, Fever, Diarrhea, Cough, Cough, Cough, cough, fatigue |         |          |         |          | fever, emesis, stomachache, fatigue |        |          |        |               |       |       |
| Severity                           |              | general                                       | general | general | severe | critical | severe                                                               | general | critical | general | critical | mild                                | severe | critical | severe | NA            | NA    | NA    |
| Duranton of viral shedding, days   |              | 88                                            | 100     | 54      | 76     | 77       | 2                                                                    | 4       | 22       | 3       | 5        | 9                                   | 17     | 8        | 18     | NA            | NA    | NA    |
| Onset of symptom to sampling, days |              | 90                                            | 102     | 56      | 78     | 80       | 98                                                                   | 89      | 70       | 85      | 89       | 71                                  | 62     | 95       | 55     | NA            | NA    | NA    |
| <b>Blood routine</b>               |              |                                               |         |         |        |          |                                                                      |         |          |         |          |                                     |        |          |        |               |       |       |
| leukocyte, × 10 <sup>9</sup> /L    | 3.50-9.50    | 6.31                                          | 6.11    | 4.81    | 4.21   | 5.41     | 7.78                                                                 | 5.09    | 3.62     | 5.95    | 19.91    | 7.59                                | 2.85   | 4.81     | 3.46   | NA            | NA    | NA    |
| neutrophil,%                       | 40.0-75.0    | 55.6                                          | 57.6    | 64.6    | 61.5   | 63.3     | 58                                                                   | 54.5    | 62.7     | 58.1    | 91.4     | 72.5                                | 59.9   | 64.6     | 50.6   | NA            | NA    | NA    |
| neutrophil,× 10 <sup>9</sup> /L    | 1.80-20.0-   | 6.30                                          | 3.51    | 3.52    | 3.11   | 2.59     | 4.51                                                                 | 2.77    | 2.77     | 3.46    | 18.21    | 5.5                                 | 1.71   | 3.11     | 1.75   | NA            | NA    | NA    |
| lymphocyte,%                       | 50.0-        | 31.5                                          | 33.4    | 28.9    | 30.6   | 28.8     | 29.3                                                                 | 32.4    | 21       | 22.2    | 2.8      | 19.2                                | 23.9   | 28.9     | 29.2   | NA            | NA    | NA    |

|                                                              |             |       |      |      |       |      |      |       |      |      |      |      |      |      |       |    |    |    |
|--------------------------------------------------------------|-------------|-------|------|------|-------|------|------|-------|------|------|------|------|------|------|-------|----|----|----|
| lymphocyte,× 10 <sup>9</sup> /L                              | 1.10-3.20   | 1.99  | 2.04 | 1.39 | 1.29  | 1.56 | 2.28 | 1.65  | 0.76 | 1.32 | 0.55 | 1.46 | 0.68 | 1.39 | 1.01  | NA | NA | NA |
| monocyte,%                                                   | 3.0-10.0    | 9.5   | 7.22 | 4.2  | 5     | 5.5  | 7.6  | 8.6   | 11.9 | 11.8 | 5.1  | 7.5  | 14   | 4.2  | 15    | NA | NA | NA |
| monocyte,× 10 <sup>9</sup> /L                                | 0.10-0.60   | 0.6   | 0.44 | 0.2  | 0.21  | 0.3  | 0.59 | 0.44  | 0.43 | 0.7  | 1.01 | 0.57 | 0.4  | 0.2  | 0.52  | NA | NA | NA |
| eosinophil,%                                                 | 0.4-8.0     | 2.9   | 1.3  | 1.9  | 2.4   | 2    | 4.5  | 4.1   | 4.1  | 7.7  | 0.6  | 0.7  | 1.8  | 1.9  | 4.9   | NA | NA | NA |
| eosinophil,× 10 <sup>9</sup> /L                              | 0.02-0.52   | 0.18  | 0.08 | 0.09 | 0.1   | 0.11 | 0.35 | 0.21  | 0.15 | 0.46 | 0.12 | 0.05 | 0.05 | 0.09 | 0.17  | NA | NA | NA |
| basophilic granulocyte,%                                     | 0.0-1.0     | 0.5   | 0.5  | 0.4  | 0.5   | 0.4  | 0.6  | 0.4   | 0.3  | 0.2  | 0.1  | 0.1  | 0.4  | 0.4  | 0.3   | NA | NA | NA |
| basophilic granulocyte,× 10 <sup>9</sup> /L                  | 0.00-0.10   | 0.03  | 0.03 | 0.02 | 0.02  | 0.02 | 0.05 | 0.02  | 0.01 | 0.01 | 0.02 | 0.01 | 0.01 | 0.01 | 0.02  | NA | NA | NA |
| PLT, × 10 <sup>9</sup> /L                                    | 125.0-350.0 | 139   | 235  | 137  | 208   | 214  | 230  | 179   | 224  | 278  | 209  | 343  | 176  | 137  | 175   | NA | NA | NA |
| <b>Coagulation function</b>                                  |             |       |      |      |       |      |      |       |      |      |      |      |      |      |       |    |    |    |
| Prothrombin time, s                                          | 11.5-14.5   | 15.6  | 14.4 | NA   | 13.9  | 13.5 | 13.2 | 13.8  | 12.9 | 13.2 | 15.3 | NA   | 12.7 | NA   | 13.9  | NA | NA | NA |
| Prothrombin Time and International Normalized Ratio (PT/INR) | 0.80-1.20   | 1.23  | 1.12 | NA   | 1.06  | 1.03 | 0.99 | 1.05  | 0.96 | 1    | 1.22 | NA   | 0.96 | NA   | 1.06  | NA | NA | NA |
| Fibrinogen, g/L                                              | 2.00-4.00   | 2.69  | 3.39 | NA   | 2.27  | 3.38 | 3.67 | 2.96  | 3.16 | 3.13 | 8.92 | NA   | 4.96 | NA   | 2.27  | NA | NA | NA |
| Activated partial thromboplastin, s                          | 29-42       | 39.6  | 37.9 | NA   | 39    | 34.8 | 38.4 | 40.6  | 45.4 | 40.4 | 43.1 | NA   | 39.3 | NA   | 39    | NA | NA | NA |
| Thrombin time, s                                             | 14-19       | 15.9  | 16.7 | NA   | 14.9  | 14.7 | 16.5 | 16.8  | 14.6 | 14.6 | 15.9 | NA   | 14.9 | NA   | 14.9  | NA | NA | NA |
| D-dimer, µg/ml                                               | <0.5        | <0.22 | 0.53 | NA   | <0.22 | 0.69 | 0.32 | <0.22 | 0.54 | 0.25 | > 21 | NA   | 0.62 | NA   | <0.22 | NA | NA | NA |

M: male; F: female; NA: not available; PLT: Platelet Count Test.
